# Supplementary material
Source: PubMed Central journal article supplement (PMC3911871)
Supplement: IAI.01094-13_zii999090471so1.pdf [file IAI.01094-13_zii999090471so1.pdf]

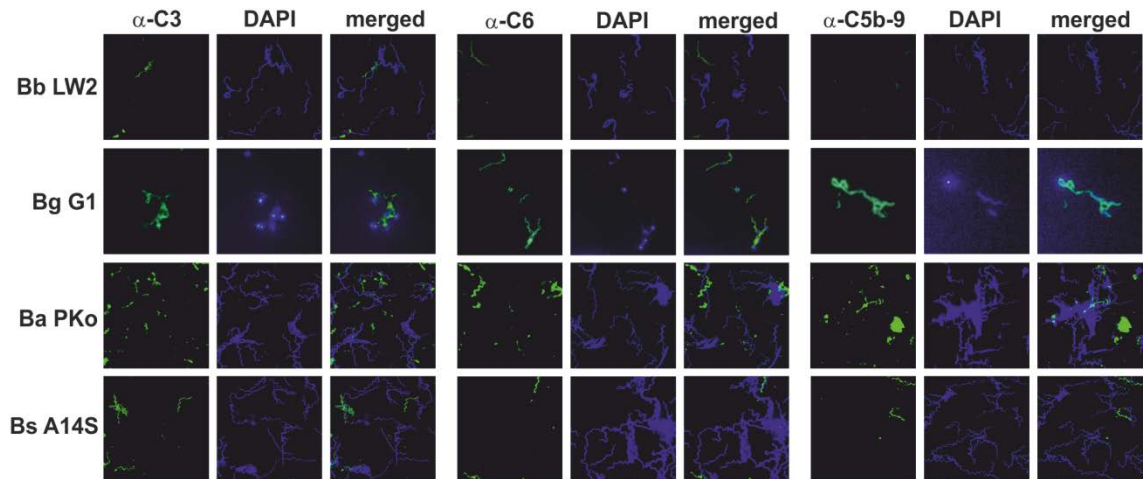

**Supplemental Figure S1:** Deposition of complement components C3, C6 and TCC on the surface of spirochetes. Complement components deposited on the surface of wild-type *B. garinii* (Bg) G1, *B. burgdorferi* (Bb) LW2, *B. afzelii* (Ba) PKo, *B. spielmanii* (Bs) A14S were visualized by indirect immunofluorescence microscopy. Spirochetes ( $6 \times 10^6$ ) were incubated with 25% NHS for 30 min at 37°C with gentle agitation and bound C3, C6, and C5b-9 (TCC) were analyzed with specific antibodies against each component and appropriate AlexaFluor 488-conjugated secondary antibodies. For visualization of the spirochetes in a given microscopic field, the DNA-binding dye DAPI was used. The spirochetes were observed at a magnification of 100 × objective. The data were recorded with an Axio Imager M2 fluorescence microscope (Zeiss) equipped with a Spot RT3 camera (Visitron Systems). Each panel shown is representative of at least 20 microscope fields.
